# Supplementary material
Source: ML conference proceedings conference paper supplement (https://openaccess.thecvf.com/content/CVPR2024/html/Yoon_CORE-MPI_Consistency_Object_CVPR_2024_paper.html)
Supplement: Supplementary file 2 [file Yoon_CORE-MPI_Consistency_Object_CVPR_2024_supplemental.zip]

Archive with 4 entries (4 files):
- [CVPR2024]2615(suppl).pdf
- __MACOSX/._[CVPR2024]2615(suppl).pdf
- demo_video.mp4
- __MACOSX/._demo_video.mp4
